# Supplementary material for: Def6 regulates endogenous type-I interferon responses in osteoblasts and suppresses osteogenesis
Source: eLife. 2020 Dec 29;9:e59659. doi: 10.7554/eLife.59659 (PMC7771961; doi:10.7554/eLife.59659)
Supplement: Figure 1—figure supplement 3—source data 1. [file elife-59659-fig1-figsupp3-data1.xlsx]

## Sheet: Sheet1
Figure 1 - figure supplement 3
Fig 1 - figure supplement 3 C
Alpl	d0	d7	d16	Bsp	d0	d7	d16	Bglap	d0	d7	d16
WT1	1	58.3866	154.231	WT1	1	2373	6054.63	WT1	1	188.516	3838.54
WT2	0.912975	56.6873	145.545	WT2	0.945428	2367.12	6076.21	WT2	0.813925	182.755	3853.26
WT3	0.967303	55.1994	145.793	WT3	1.39084	2209.14	5906.72	WT3	1.08383	190.697	3679.39
Def6-/-1	0.687837	88.1564	250.767	Def6-/-1	1.6288	3814.58	11480.3	Def6-/-1	1.16162	595.798	6872.37
Def6-/-2	0.654286	84.5136	249.967	Def6-/-2	1.52468	4015.55	11689.5	Def6-/-2	0.878404	593.726	6974.1
Def6-/-3	0.654639	90.4087	251.884	Def6-/-3	1.04151	3953.57	12338.4	Def6-/-3	1.31398	613.357	7504.92
Fig 1 - figure supplement 3 D
Mx1	d0	d7	Ifit1	d0	d7	Ifit2	d0	d7	Eif2ak2	d0	d7
WT1	0.132233	142.406	WT1	2.51924	57.1646	WT1	1.24669	20.7065	WT1	0.775375	5.06675
WT2	2.81767	140.866	WT2	2.73429	56.9974	WT2	1.31756	21.4711	WT2	1.05866	5.19159
WT3	2.11491	141.636	WT3	2.93958	58.0825	WT3	1.20787	21.991	WT3	1.04931	5.09211
Def6-/-1	1.30446	85.232	Def6-/-1	1.27194	23.2055	Def6-/-1	0.945341	8.54173	Def6-/-1	0.85507	2.90387
Def6-/-2	0.711807	79.3107	Def6-/-2	1.18886	22.1827	Def6-/-2	0.912272	8.33954	Def6-/-2	0.808705	2.58331
Def6-/-3	0.831743	82.2713	Def6-/-3	1.19095	21.9962	Def6-/-3	1.10077	7.81321	Def6-/-3	0.930735	2.63675
