# Supplementary material for: Def6 regulates endogenous type-I interferon responses in osteoblasts and suppresses osteogenesis
Source: eLife. 2020 Dec 29;9:e59659. doi: 10.7554/eLife.59659 (PMC7771961; doi:10.7554/eLife.59659)
Supplement: Figure 1—figure supplement 4—source data 1. [file elife-59659-fig1-figsupp4-data1.xlsx]

## Sheet: Sheet1
Fig. 1-figure supplement 4
Fig. 1-figure supplement 4 B
Alp	d0	d7	Bsp	d0	d7	Bglap	d0	d7
WT OB+WT BMM1	1	39.5702	WT OB+WT BMM1	1	13.201	WT OB+WT BMM1	1	99.4704
WT OB+WT BMM2	0.887861	40.3785	WT OB+WT BMM2	0.761898	13.3904	WT OB+WT BMM2	1.19954	92.1429
WT OB+WT BMM3	0.972103	37.985	WT OB+WT BMM3	0.575866	12.3459	WT OB+WT BMM3	1.2021	93.9027
WT OB+Def6-/- BMM1	0.815154	43.518	WT OB+Def6-/- BMM1	0.370301	11.3366	WT OB+Def6-/- BMM1	1.41201	99.3229
WT OB+Def6-/- BMM2	0.793622	44.7467	WT OB+Def6-/- BMM2	0.762666	10.6782	WT OB+Def6-/- BMM2	1.41592	96.0192
WT OB+Def6-/- BMM3	0.766431	42.1294	WT OB+Def6-/- BMM3	0.198889	13.7445	WT OB+Def6-/- BMM3	1.75896	90.2334
