# Supplementary material for: Def6 regulates endogenous type-I interferon responses in osteoblasts and suppresses osteogenesis
Source: eLife. 2020 Dec 29;9:e59659. doi: 10.7554/eLife.59659 (PMC7771961; doi:10.7554/eLife.59659)
Supplement: Figure 1—source data 1. [file elife-59659-fig1-data1.xlsx]

## Sheet: Sheet1
Figure 1 A
Def6	d0	d7	d14	d21		Figure 1 D (ARS absorbance)
WT1	1	1.44215	1.8603	1.93846		WT1	0.108867	KO1	0.270233
WT2	0.950869	1.56928	2.13083	1.91857		WT2	0.115067	KO2	0.2027
WT3	0.91981	1.41795	2.03923	1.86448		WT3	0.0946333	KO3	0.258833
Def6_KO1	0.000190891	0.00134572	0.00155924	0.00155705		WT4	0.0661	KO4	0.301267
Def6_KO2	0.000959156	0.00221164	0.0016671	0.000789603		WT5	0.0711333	KO5	0.322533
Def6_KO3	0.000774444	0.00424413	0.00174254	0.00130328		WT6	0.0759333	KO6	0.357933
Figure 1 E
Alpl	d0	d7	d14	d21	Bsp	d0	d7	d12	Bglap	d0	d7	d12
WT1	1	12.6	21.6347	16.0011	WT1	1	225.186	2488.53	WT1	1	9.11238	234.753
WT2	0.839264	13.0599	20.3248	14.4075	WT2	1.29988	258.405	2640.2	WT2	0.877157	9.63533	218.798
WT3	0.962723	12.4255	20.4954	14.8922	WT3	1.13323	266.195	2543.35	WT3	0.910906	8.95313	235.389
Def6_KO1	3.08826	44.0893	72.7791	42.2076	Def6_KO1	1.31472	419.306	6374.31	Def6_KO1	1.06571	15.5658	596.659
Def6_KO2	3.08473	39.9052	67.331	41.4273	Def6_KO2	1.72448	439.253	6253.59	Def6_KO2	1.02748	15.1437	635.965
Def6_KO3	3.09094	38.1337	67.9216	39.3909	Def6_KO3	1.39633	415.711	6053.83	Def6_KO3	0.924251	14.8887	603.371
