# Supplementary material for: Def6 regulates endogenous type-I interferon responses in osteoblasts and suppresses osteogenesis
Source: eLife. 2020 Dec 29;9:e59659. doi: 10.7554/eLife.59659 (PMC7771961; doi:10.7554/eLife.59659)
Supplement: Figure 2—figure supplement 1—source data 1. [file elife-59659-fig2-figsupp1-data1.xlsx]

## Sheet: Sheet1
Fig. 2-figure supplement 1
BV/TV
WT	Def6_KO
22.8097	16.7726
21.6744	11.8009
15.5963	20.653
19.3271	18.2899
22.2666	17.5907
21.7483	13.9471
23.2756
