# Supplementary material for: Def6 regulates endogenous type-I interferon responses in osteoblasts and suppresses osteogenesis
Source: eLife. 2020 Dec 29;9:e59659. doi: 10.7554/eLife.59659 (PMC7771961; doi:10.7554/eLife.59659)
Supplement: Figure 2—source data 1. [file elife-59659-fig2-data1.xlsx]

## Sheet: Sheet1
Figure 2 B
MAR(μm/day)		BFR/BS(%/day)
WT	Def6_KO	WT	Def6_KO
1.9794	3.2316	0.5951	0.823
2.0837	2.9498	0.5877	0.6685
1.9253	2.5884	0.5857	0.6556
1.8195	2.256	0.3864	0.6921
1.913	2.1358	0.2945	0.6807
1.6792	2.4955	0.5653	0.4839
	3.0775		0.8896
Figure 2 D
Ob.S/B.S(%)		N.Ob/B.Pm
WT	Def6_KO	WT	Def6_KO
9.9387	14.4232	8.0024	13.1047
10.9654	12.933	9.3161	11.9497
11.1706	14.4686	8.2605	12.3384
10.4187	16.1508	8.9499	13.6346
12.3277	15.794	10.1014	14.3062
11.7841	15.7531	8.3998	13.0827
10.8915	15.423	8.4764	12.5548
11.4867	15.6894	9.0562	12.5188
10.3048	15.1502	9.1836	13.3979
10.5666		8.9077
