# Supplementary material for: Def6 regulates endogenous type-I interferon responses in osteoblasts and suppresses osteogenesis
Source: eLife. 2020 Dec 29;9:e59659. doi: 10.7554/eLife.59659 (PMC7771961; doi:10.7554/eLife.59659)
Supplement: Figure 3—source data 1. [file elife-59659-fig3-data1.xlsx]

## Sheet: Sheet1
Figure 3
Fig 3 E
Mx1	d0	d12	Ifit1	d0	d12	Ifit2	d0	d12	Cxcl10	d0	d12	Stat1	d0	d12	Eif2ak2	d0	d12
WT1	1	39.7443	WT1	1	25.6296	WT1	1	3.99202	WT1	1	10.4198	WT1	1	10.6576	WT1	1	10.6219
WT2	0.592272	40.7031	WT2	0.971656	26.9495	WT2	1.29074	3.25119	WT2	0.413274	10.5491	WT2	1	10.5357	WT2	1	11.5822
WT3	0.766803	40.2237	WT3	0.753681	26.5101	WT3	0.869113	3.50118	WT3	0.448677	8.41547	WT3	1	10.8459	WT3	1	9.11844
Def6-/-1	1.52004	18.0607	Def6-/-1	0.478919	12.8899	Def6-/-1	0.636992	1.7172	Def6-/-1	0.292328	0.778297	Def6-/-1	1	6.01838	Def6-/-1	1	3.47239
Def6-/-2	1.5312	18.1212	Def6-/-2	0.371486	11.621	Def6-/-2	0.339852	1.2445	Def6-/-2	0.21731	0.75939	Def6-/-2	1.00415	6.20802	Def6-/-2	0.516578	3.95099
Def6-/-3	2.98506	11.4973	Def6-/-3	0.412706	8.93808	Def6-/-3	0.470401	1.92317	Def6-/-3	0.166185	0.854455	Def6-/-3	1.1648	5.31507	Def6-/-3	0.870461	3.9001
