# Supplementary material for: Def6 regulates endogenous type-I interferon responses in osteoblasts and suppresses osteogenesis
Source: eLife. 2020 Dec 29;9:e59659. doi: 10.7554/eLife.59659 (PMC7771961; doi:10.7554/eLife.59659)
Supplement: Figure 4—source data 1. [file elife-59659-fig4-data1.xlsx]

## Sheet: Sheet1
Figure 4
Fig 4 A
Mx1	d0	d13 control	d13 + IFNb Ab 10U	Ifit2	d0	d13 control	d13 + IFNb Ab 10U
WT1	1	7.04507	4.44222	WT1	1	2.91826	1.5382
WT2	0.851608	12.1765	4.91585	WT2	Undetermined	2.4543	1.82376
WT3	0.187184	11.7575	1.812	WT3	0.996065	2.43511	1.53596
Def6-/-1	5.329	3.93314	2.91298	Def6-/-1	1.25726	1.63111	1.02812
Def6-/-2	5.90815	2.68915	4.16848	Def6-/-2	1.45936	2.0492	0.677139
Def6-/-3	4.86878	6.716	5.86178	Def6-/-3	1.19326	2.26812	0.874034
Fig 4 B
Bsp	d0	d7 control	d7 + IFNb Ab 10U	Bglap	d0	d7 control	d7 + IFNb Ab 10U
WT1	1	460.143	2352.82	WT1	1	35.1373	169.686
WT2	1.46076	443.001	2288.01	WT2	0.952229	36.0966	183.319
WT3	1.06524	338.273	2200.86	WT3	0.921837	33.2646	207.154
Def6-/-1	1.12752	2432.95	2600.94	Def6-/-1	1.15115	237.824	344.112
Def6-/-2	1.48992	2330.5	2587.13	Def6-/-2	1.33174	261.019	344.751
Def6-/-3	1.32507	2184.74	2528.93	Def6-/-3	0.77449	240.813	385.712
