# Supplementary material for: Def6 regulates endogenous type-I interferon responses in osteoblasts and suppresses osteogenesis
Source: eLife. 2020 Dec 29;9:e59659. doi: 10.7554/eLife.59659 (PMC7771961; doi:10.7554/eLife.59659)
Supplement: Figure 5—figure supplement 1—source data 1. [file elife-59659-fig5-figsupp1-data1.xlsx]

## Sheet: Sheet1
Fig. 5-figure supplement 1
Ifnar1	d0	d12	Ifnar2	d0	d12
WT1	1	2.22972	WT1	1	2.57788
WT2	1.00019	2.17243	WT2	0.810373	2.54092
WT3	0.894771	1.52393	WT3	0.828982	2.75049
Def6-/-1	1.30578	1.64528	Def6-/-1	1.11541	2.26763
Def6-/-2	1.24016	1.71243	Def6-/-2	0.988959	2.29679
Def6-/-3	1.31829	1.65826	Def6-/-3	1.07612	2.347
