# Supplementary material for: Def6 regulates endogenous type-I interferon responses in osteoblasts and suppresses osteogenesis
Source: eLife. 2020 Dec 29;9:e59659. doi: 10.7554/eLife.59659 (PMC7771961; doi:10.7554/eLife.59659)
Supplement: Figure 5—source data 1. [file elife-59659-fig5-data1.xlsx]

## Sheet: Sheet1
Figure 5
Fig 5E
Mx1	IFNb (0 h)	IFNb (3h)	Ifit2	IFNb (0 h)	IFNb (3h)	Irf7	IFNb (0 h)	IFNb (3h)
WT1	1	1478.73	WT1	1	107.158	WT1	1	23.4889
WT2	1.33611	1540.42	WT2	1.11249	107.961	WT2	1.04407	24.17
WT3	0.893799	1577.71	WT3	0.846621	109.493	WT3	0.992125	19.255
Def6-/-1	0.748696	810.099	Def6-/-1	0.356087	26.8661	Def6-/-1	0.195942	11.3192
Def6-/-2	0.61275	816.981	Def6-/-2	0.317707	27.5858	Def6-/-2	0.212187	11.4485
Def6-/-3	0.134346	824.512	Def6-/-3	0.397797	28.7423	Def6-/-3	0.221428	11.1333
