# Supplementary material for: Def6 regulates endogenous type-I interferon responses in osteoblasts and suppresses osteogenesis
Source: eLife. 2020 Dec 29;9:e59659. doi: 10.7554/eLife.59659 (PMC7771961; doi:10.7554/eLife.59659)
Supplement: Figure 6—figure supplement 1—source data 1. [file elife-59659-fig6-figsupp1-data1.xlsx]

## Sheet: Sheet1
Figure 6 - figure supplement 1
Ifnb	d0	d3	d12
WT1	1	1.57924	1.1212
WT2	0.574957	1.38204	0.886765
WT3	0.818802	1.48064	1.00398
Def6-/-1	0.434209	0.991933	0.197372
Def6-/-2	0.14229	1.14285	0.477727
Def6-/-3	0.28825	1.06739	0.337549
