# Supplementary material for: Def6 regulates endogenous type-I interferon responses in osteoblasts and suppresses osteogenesis
Source: eLife. 2020 Dec 29;9:e59659. doi: 10.7554/eLife.59659 (PMC7771961; doi:10.7554/eLife.59659)
Supplement: Figure 6—figure supplement 2—source data 1. [file elife-59659-fig6-figsupp2-data1.xlsx]

## Sheet: Sheet1
Fig. 6-figure supplement 2
IFNα(pg/mL)
WT	DEF6 KO
1.08418	0.615944
0.17848	0.667318
0.633034	2.58126
1.16276	1.51737
0.907219	0.622776
