# Supplementary material for: Def6 regulates endogenous type-I interferon responses in osteoblasts and suppresses osteogenesis
Source: eLife. 2020 Dec 29;9:e59659. doi: 10.7554/eLife.59659 (PMC7771961; doi:10.7554/eLife.59659)
Supplement: Figure 6—source data 1. [file elife-59659-fig6-data1.xlsx]

## Sheet: Sheet1
Figure 6 A			Figure 6 B	D0	D3	D6	D9	D12	D15	D18	D21
WT	Def6 KO		WT1	1.5065	1.46021	2.80831	1.93393	1.95185	1.5743	1.44214	1.14855
4.4038	4.09956		WT2	1.17298	1.48265	2.52652	1.89385	2.10001	1.19743	1.45079	1.50526
4.31643	3.56005		WT3	1.43596	1.45227	2.78612	1.94428	1.64942	1.44585	1.14245	1.61956
4.37737	3.74886		WT4	1.42484	1.45079	2.89986	1.52758	1.43596	1.41249	1.3041	1.45887
4.47737	3.65586		WT5	1.22599	1.46102	2.57442	1.8823	1.89201	1.4086	1.44876	1.43822
4.76871	3.8679		Def6_KO1	0.243032	0.29841	0.240689	0.133175	0.282908	0.325212	0.264134	0.259443
			Def6_KO2	0.230147	0.27551	0.260615	0.255925	0.209079	0.298175	0.224293	0.264134
			Def6_KO3	0.262961	0.27884	0.239517	0.217269	0.320507	0.226634	0.255925	0.204487
			Def6_KO4	0.104053	0.292302	0.333447	0.268826	0.265307	0.227805	0.292302	0.249874
			Def6_KO5	0.215584	0.287741	0.268879	0.224588	0.281125	0.258842	0.281566	0.239985
Figure 6 E
Alp	d0	d12	d21	Bglap	d0	d12	d21	Mx1	d0	d12	d21	Ifit1	d0	d12	d21	Irf7	d0	d12	d21
WT1	1.11646	355.546	388.337	WT1	1.09317	975.426	1352.46	WT1	0.806207	26.0665	48.8942	WT1	0.978913	40.038	62.7704	WT1	1.12949	33.907	80.9635
WT2	1.00782	378.349	401.744	WT2	1.15567	1013.15	1313.85	WT2	1.48123	29.8814	57.9561	WT2	0.955247	39.9882	62.0763	WT2	0.981913	32.0305	83.2244
WT3	0.888736	321.907	359.203	WT3	0.791551	1079.83	1363.58	WT3	0.837395	31.0186	52.8411	WT3	1.0694	40.5714	61.7749	WT3	0.901667	30.2557	71.9914
Ifnar1-/-1	1.01747	524.423	846.266	Ifnar1-/-1	0.811927	3004.17	9943.75	Ifnar1-/-1	0.0495741	1.28757	0.578696	Ifnar1-/-1	0.186565	0.607627	0.365572	Ifnar1-/-1	0.169231	1.12029	1.18681
Ifnar1-/-2	0.946704	510.741	819.436	Ifnar1-/-2	1.1221	3024.43	10154.6	Ifnar1-/-2	0.0781849	1.24748	0.651896	Ifnar1-/-2	0.166016	0.576276	0.374728	Ifnar1-/-2	0.155941	1.21273	1.0231
Ifnar1-/-3	1.03816	479.854	771.229	Ifnar1-/-3	1.09762	3144.32	9680.43	Ifnar1-/-3	0.122904	1.04028	1.40371	Ifnar1-/-3	0.174073	0.660002	0.328815	Ifnar1-/-3	0.139088	0.998901	0.901676
Figure 6 H
Ifnb	d0	d6	Mx1	d0	d6	Ifit1	d0	d6	Stat1	d0	d6	Irf7	d0	d6
WT1	0.835834	8.48755	WT1	0.931681	93.2206	WT1	1.01355	18.0457	WT1	1.08339	15.7232	WT1	0.963486	38.6858
WT2	0.847576	8.1641	WT2	1.01762	96.3419	WT2	0.999152	17.5691	WT2	1.02282	17.3527	WT2	1.07381	33.6196
WT3	1.41157	5.35174	WT3	1.05474	90.0728	WT3	0.987464	17.2204	WT3	0.902434	15.5732	WT3	0.966556	35.795
PKR_LNA1	0.597708	2.09847	PKR_LNA1	0.98104	16.2977	PKR_LNA1	1.01328	7.44474	PKR_LNA1	1.02285	7.22061	PKR_LNA1	0.991057	10.6874
PKR_LNA2	1.16292	1.22575	PKR_LNA2	0.961349	17.5087	PKR_LNA2	1.00364	7.50106	PKR_LNA2	1.01985	7.00671	PKR_LNA2	1.02022	10.8051
PKR_LNA3	1.43866	1.56544	PKR_LNA3	1.06031	16.4759	PKR_LNA3	0.983316	7.26583	PKR_LNA3	0.958635	6.89744	PKR_LNA3	0.989024	9.58638
Figure 6 J
Runx2	d0	d6	Alpl	d0	d6	Bglap	d0	d6	Bsp	d0	d6
WT1	1.02626	2.17355	WT1	1.04857	16.4966	WT1	1.02614	25.2111	WT1	1.32516	4.64555
WT2	0.989151	2.23868	WT2	1.0374	18.4624	WT2	1.03118	24.65	WT2	0.853188	3.40867
WT3	0.985095	2.2897	WT3	0.919297	15.5705	WT3	0.945055	24.8207	WT3	0.884478	3.88141
PKR_LNA1	0.979668	3.46284	PKR_LNA1	1.13169	63.4	PKR_LNA1	1.12715	37.9225	PKR_LNA1	0.975807	12.2586
PKR_LNA2	1.00724	3.63172	PKR_LNA2	0.943807	64.2273	PKR_LNA2	0.903334	35.8565	PKR_LNA2	1.0008	16.9372
PKR_LNA3	1.01342	3.65654	PKR_LNA3	0.936243	59.6728	PKR_LNA3	0.982134	36.6316	PKR_LNA3	1.02397	14.4393
Figure 6 L
Ifnb	d0	d3	Mx1	d0	d3	Irf7	d0	d3	Ifit1	d0	d3	Alpl	d0	d3	Bsp	d0	d3
Def6-/- control 1	1	1.4383	Def6-/- control 1	0.936087	4.11342	Def6-/- control 1	1.19934	2.84322	Def6-/- control 1	1.34851	2.82097	Def6-/- control 1	0.743575	2.96734	Def6-/- control 1	0.754063	12.8809
Def6-/- control 2	0.693235	1.87659	Def6-/- control 2	1.44187	5.51561	Def6-/- control 2	1.39929	3.0408	Def6-/- control 2	1.32778	2.95352	Def6-/- control 2	0.667267	2.9533	Def6-/- control 2	0.793995	14.0428
Def6-/- control 3	0.846618	1.65744	Def6-/- control 3	1.18898	5.43563	Def6-/- control 3	1.27072	2.87809	Def6-/- control 3	1.45106	2.97394	Def6-/- control 3	0.720621	2.97665	Def6-/- control 3	0.582556	14.048
Def6-/- PKR 1	2.19937	2.98393	Def6-/- PKR 1	2.12567	10.7421	Def6-/- PKR 1	1.90041	8.18126	Def6-/- PKR 1	1.72695	7.53561	Def6-/- PKR 1	0.691009	2.43505	Def6-/- PKR 1	0.313302	7.09765
Def6-/- PKR 2	1.79584	2.67579	Def6-/- PKR 2	2.72632	12.9099	Def6-/- PKR 2	1.38599	9.09428	Def6-/- PKR 2	1.70248	7.78768	Def6-/- PKR 2	0.645551	2.22916	Def6-/- PKR 2	0.312998	7.42853
Def6-/- PKR 3	1.99761	2.82986	Def6-/- PKR 3	2.426	11.826	Def6-/- PKR 3	1.55797	8.45542	Def6-/- PKR 3	2.03438	8.16748	Def6-/- PKR 3	0.74503	2.34484	Def6-/- PKR 3	0.332431	7.27855
